# Supplementary material
Source: Springer Nature journal article supplement (https://www.springermedizin.de/resource/supplementary/12986_2013_571_MOESM8_ESM.pdf/25655056)

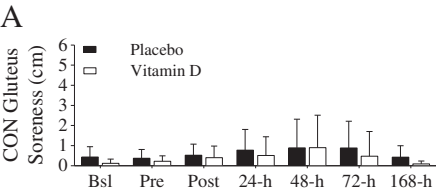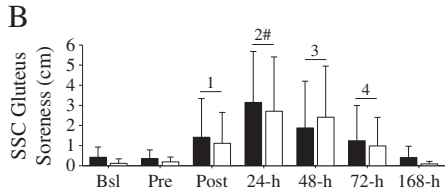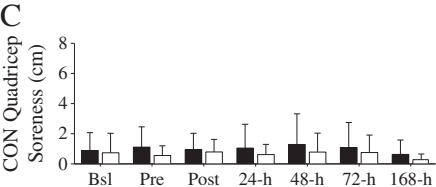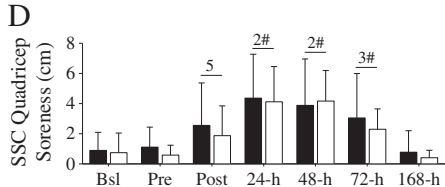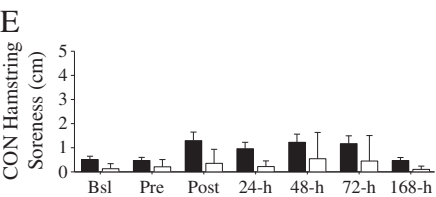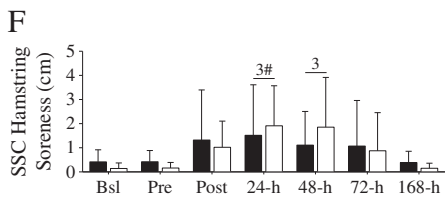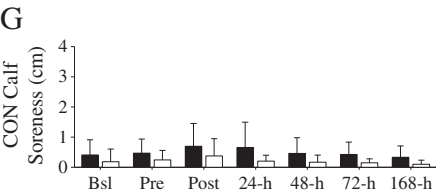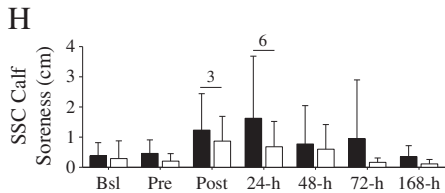

Supplement: MOESM8 [file 25655056]
